# Supplementary material for: The macroevolution of size and complexity in insect male genitalia
Source: PeerJ. 2016 Apr 14;4:e1882. doi: 10.7717/peerj.1882 (PMC4841225; doi:10.7717/peerj.1882)
Supplement: Table S1 — Specimens used, with locality, collector, voucher, species group according to Rudoy et al. (in press) and genbank accession numbers. Nf and Nm, number of females and males measured respectively; Ng, number of male genitalias measured; lf and lm, length of females and males respectively; stv.lf and stv.lm, standard deviation of lf and lm (for less than seven specimens the total range is given); lg, length of the male genitalia; stv.lg, standard deviation of lg. [file peerj-04-1882-s001.xlsx]

## Sheet: Hoja1
Rudoy & Ribera, The macroevolution of size and complexity in insect male genitalia
Table S1
Specimens used, with locality, collector, voucher, species group according to Rudoy et al. (in press) and genbank accession numbers. Nf and Nm, number of females and males measured respectively; Ng, number of male genitalias measured; lf and lm, length of females and males respectively; stv.lf and stv.lm, standard deviation of lf and lm (for less than seven specimens the total range is given); lg…
all	genus	subgenus	species group	species	voucher	country	Loc.	year	collector	barcode	COI	16S+tRNA-Leu	18S	28S	Nf	Nm	Ng	lm	stv.lm	lf	stv.lf	lg	stv.lg
1	Laeliaena			Laeliaena sahlbergi	MNCN-HI19	India	14.XI.2006 India, UTTARANCHAL 20: River Falda, ca. 5-10 m wide, partly with larger boulders, left tributary of River Saryu, at Falda [village], ca. 15 km north of Bageshwar [town]; Bageshwar District 1010 m a.s.l.; 29°55'11''N/79°52'08''E, M.A. Jäch leg.	2006	M.A. Jäch	LN995192	LN995232	LN995260	LN995286	-	1	3	3	1.21169	1.20-1.22	1.247	?	0.341822	0.32-0.35
2	Limnebius	Bilimneus		Limnebius	IBE-AF190	India	14.XI.2006 India, UTTARANCHAL 20: River Falda, ca. 5-10 m wide, partly with larger boulders, left tributary of River Saryu, at Falda [village], ca. 15 km north of Bageshwar [town]; Bageshwar District 1010 m a.s.l.; 29°55'11''N/79°52'08''E, M.A. Jäch leg.	2006	M.A. Jäch	-	LN995233	LN995261	LN995287	LN995347	0	0	0	?	?	?	?	?	?
3	Limnebius	Bilimneus		Limnebius	IBE-AF193	India	12.XI.2006 India, UTTARANCHAL 10 (HKH Sampling Site): River Bhauri, ca. 5 m wide, with large boulders, flowing through shady gorge, left tributary of River Nadakini, ca. 5 km E Nandaprayag; Chamoli District 1120 m a.s.l.; 30°16'54''N/79°23'16''E M.A. Jäch leg.	2006	M.A. Jäch	-	LN995234	LN995262	LN995288	LN995348	0	1	1	0.99	?	?	?	0.39	?
4	Limnebius	Bilimneus		Limnebius	MNCN-AI549	Madagascar	Madagascar, Montagne d'Ambre, Foret d' Ambre, 545m, xi./xii.2004, MD 010, M. Balke & M. Monaghan	2004	M. Balke	-	LN995235	LN995263	LN995289	LN995349	0	0	0	?	?	?	?	?	?
5	Limnebius	Bilimneus		Limnebius	MNCN-AI1271	Bhutan	BHUTAN loc. 30: Bhur Khola [river], ca. 30 m wide, gravel banks, furcations; 11 km NW of Sarpang; Sarpang Prov.; ca. 350 m a.s.l.; 26°55'23''N/90°23'51''E; 27.XI.2005	2005	M.A. Jäch	LN995194	LN995236	LN995264	LN995290	LN995350	4	0	0	?	?	1.06375	1.00-1.16	?	?
6	Limnebius	Bilimneus		Limnebius	IBE-AR12	Philippines	PHIL., Palawan, Brookes P., Salogon, Tagbinacao Riv./Sitio,mount creek, rocks, bolders, gravel, riffle sec. Veget. 120m asl., 8º44'19"N 117º42'10"E 01.9.1994, leg. Freitag (147a)M	1994	H. Freitag	-	-	LN995265	LN995291	LN995351	0	0	0	?	?	?	?	?	?
7	Limnebius	Bilimneus		Limnebius	IBE-RA627	China	China Shaanxi prov. 11.v.2011 Xian, Bahe river (pools) 34º21.2'N 109º0.6'E, 365m M. Balke & J. Häjek leg.	2011	M. Balke & J. Hájek	LN995195	LN995237	-	-	LN995352	0	0	0	?	?	?	?	?	?
8	Limnebius	Bilimneus		Limnebius acupunctus	MNCN-AI582	Australia	SA 1K W Cudlee Creek, River Torrens 14.1.2006	2006	C.H.S. Watts	LN995196	LN995238	LN995266	LN995292	LN995353	0	0	0	[0.85]	?	?	?	[0.21]	?
9	Limnebius	Bilimneus		Limnebius atomus	MNCN-AI1217	Austria	1 Austria 02072001 Voralberg / Pfänderstock, Bodensee. Hörbranz vic. / Leiblach-Mündung / 400 m N47º32'01" E 9º43'46"	2001	I. Ribera	LN995197	HF931174	HF931394	LN995309	LN995354	6	12	9	0.9897	0.0308	1.05858	1.01-1.12	0.414879	0.0154
10	Limnebius	Bilimneus		Limnebius dioscoridus	IBE-RA728	Socotra (Yemen)	Yemen, Socotra Island / Wadi Ayhaft / 12º36.5'N, 53º58.9'E 200m / Jiri Hájek leg. 7-8.xi.2010	2010	J. Hájek	LN995198	LN995239	-	LN995310	LN995355	4	4	1	0.840315	0.74-0.77	0.98114	0.82-0.86	0.229207	?
11	Limnebius	Bilimneus		Limnebius evanescens	MNCN-AI915	Morocco	52 MOROCCO 24.4.2000 / Ou-Maghous, Amaghouz / 29º43'62.6"N 9º10'10.9"W / 600m I.Ribera leg. / 240400	2000	I. Ribera, P. Aguilera, C. Hernando & A. Millán	-	HF931241	HF931473	LN995311	LN995356	14	36	32	0.884667	0.04	1.01227	0.039183	0.322334	0.0144
12	Limnebius	Bilimneus		Limnebius extraneus	IBE-RA89	Spain	Huelva / Encina Sola / Río Barranco Frío / 260798	1998	I. Ribera	LN995199	HF931321	HF931544	LN995312	LN995357	10	17	15	0.835748	0.044	0.947048	0.053227	0.371796	0.015
13	Limnebius	Bilimneus		Limnebius feuerborni	IBE-AR11	Bali	INDONESIA, C Bali, valley W rd. Payangan-Batur, mount creek in sec. Veg./farmland, helophyts, woodliter, gravel, CPOM, c.850m asl, c.08º21'S 115º 16'E 07.10.2008 leg. Freitag(14)	2008	H. Freitag	LN995200	-	-	LN995313	LN995358	0	1	1	0.828904	?	?	?	0.247508	?
14	Limnebius	Bilimneus		Limnebius myrmidon	MNCN-AI703	Corsica (France)	Corte, river Restonica, 2 15.9.1999	1999	I. Ribera & A. Cieslak	-	LN995240	LN995267	LN995293	LN995359	22	34	14	0.890618	0.041	0.970629	0.0262861	0.225549	0.0072
15	Limnebius	Bilimneus		Limnebius nakanei nakanei	MNCN-AC30	Japan	Kawauchi-gowa, Yamato-son, Amami, Kagoshima-Pref., 17.7.2006	2006	Y. Kamite	LN995208	-	-	LN995314	LN995360	10	6	4	0.856396	0.84-0.87	0.981273	?	0.228782	0.23-0.30
16	Limnebius	Bilimneus		Limnebius oblongus	MNCN-AI942	Morocco	60 MOROCCO 21.4.2001 /30º39’456”N 9º21’134”W /Immouzèr-des-Ida-Outanane/Assif Tanit, 550 m	2001	I. Ribera & A. Cieslak		HF931244	HF931479	LN995315	LN995361	8	13	11	1.0095	0.0422	1.07894	0.0225595	0.430129	0.0097
17	Limnebius	Bilimneus		Limnebius pararabicus	IBE-RA761	United Arab Emirates	UAE: Ras al-Khaimah / (south), Wadi Shawkah / Hajar Mountains (UAE 2) / ca. 80 km ESE Dubai / 23.I.10, leg. M.A. Jäch / residual pools / above dammed area / ca. 303 m a.s.l. / 25°06'14.1''N / 56°02'46.4''E	2010	M.A. Jäch	-	-	-	LN995316	LN995362	1	9	8	0.816278	0.035	0.995547	?	0.261026	0.0116
18	Limnebius	Bilimneus		Limnebius perparvulus	MNCN-AI428	Corsica (France)	7, Cassamozza: r. l’Abatescu,19.9.1999	1999	I. Ribera & A. Cieslak	-	HF931198	HF931423	LN995317	LN995363	37	47	21	0.909479	0.0421	0.998051	0.0478326	0.440799	0.023
19	Limnebius	Bilimneus		Limnebius pollex	IBE-RA1019	Mauritius	MAURITIUS Le Pouce, S Port Louis 20o12'02.0''/57o31'28.0''E 608 m a.s.l., 29.XI.2012, leg. M.A. Jäch (MAU 8)”, “small rock pools in intermittent stream partly shaded between bushes”	2012	M.A. Jäch	LN995201	-	LN995268	LN995294	LN995364	0	1	1	0.934992	?	?	?	0.436814	?
20	Limnebius	Bilimneus		Limnebius wewalkai	IBE-RA108	Oman	6 Oman 6.4.2010 J. Al-Akhdar, wadi Bani Awf residual pools, N23 13 42.9 E57 25 25.8 660m, Ribera, Cieslak & Hernando leg.	2010	I. Ribera, C. Hernando & A. Cieslak	LN995202	LN995241	LN995269	LN995295	LN995365	10	13	7	0.83311	0.032	0.910236	0.0428301	0.357775	0.0086
21	Limnebius	Bilimneus		Limnebius endroedyi	IBE-AN78	South Africa	12 SA, W Cape 23.3.2001/Kareedouwberg, Rd. R407/river in Skoop Drif/I.Ribera & A. Cieslak leg. / 230301	2001	I. Ribera & A. Cieslak	LN995203	LN995242	LN995270	LN995296	LN995366	1	1	1	1.03	?	1.07973	?	0.41	?
22	Limnebius	Limnebius	gracilipes	Limnebius cordobanus	MNCN-AI1024	Spain	Almería, Abrucena, Río Nacimiento 19.5.2006	2006	A. Castro	HG915298	HF931144	HF931363	LN995318	LN995367	14	24	11	0.917478	0.0573	1.00889	0.0488986	0.334532	0.01
23	Limnebius	Limnebius	gracilipes	Limnebius cordobanus	IBE-PA275	Spain	3 ES Teruel, Beceite/r. Matarranya, El Parrisal/680m N40º47’12.5” E0º12’13.5”/I. Ribera leg. 3.6.2006/ / 030606	2006	I. Ribera	-	HF931292	HF931527	LN995319	LN995368	0					?	?
24	Limnebius	Limnebius	gracilipes	Limnebius fallaciosus	IBE-RA1121	Greece	2 GR, Achaïa, 1.5Km NE Klitor, mountain stream+fen w. dead trees, 37°53'31.55"N 22°3'26.92"E 600m, I.Ribera&A.Cieslak leg. 3.iv.2013	2013	I. Ribera & A. Cieslak	-	LN995243	LN995271	-	LN995369	28	22	4	1.31295	0.0346	1.40382	0.0410495	0.420972	0.41-0.45
25	Limnebius	Limnebius	gracilipes	Limnebius gracilipes	MNCN-AI1094	Tenerife (Spain)	Chamorga, Bco. Roque Bermejo 20.7.2006	2006	A. Castro	-	HF931156	HF931375	LN995320	LN995370	0	15	5	1.31665	0.0544047	?	1.43-1.54	0.395987	0.37-0.42
26	Limnebius	Limnebius	nitidus-mundus	Limnebius murentius	IBE-AN53	Turkey	25/vi/2014 TR Mugla; stream 5 km NNE of; Göcek	2014	D.T. Bilton	-	LN995244	-	-	LN995371	4	10	10	1.0856	0.041	1.14654	1.10-1.18	0.316168	0.0106
27	Limnebius	Limnebius	nitidus-nitiduloides	Limnebius alibeii	IBE-RA90	Morocco	71 MOROCCO 8.4.2007/Tizi-n'Rechou, Kerrouchèn/stream on rock N pass, rd. 3437/1570m N32º48'22.1" W5º16'13.9"/Aguilera Hernando & Ribera leg. / 8.4.2007	2007	I. Ribera, P. Aguilera & C. Hernando	LN995204	HF931322	HF931545	LN995321	LN995372	1	4	4	2.16056	2.11-2.20	1.99262	?	1.08799	1.07-1.11
28	Limnebius	Limnebius	nitidus-nitiduloides	Limnebius crassipes	IBE-RA68	Crete (Greece)	5 GR Crete, Prefecture of Chania, Municipality of Sfakia, Argoules: stream, 14.02.2008, 35°11'45,15" 24°17'18,78" Kick and sweep, water netting, manual singling, drift-net, Z.Csabai leg	2008	Z. Csabai et al.	-	LN995245	LN995272	LN995297	LN995373	11	13	5	2.32559	0.0862	1.921	0.0862477	0.730081	0.68-0.77
29	Limnebius	Limnebius	nitidus-nitiduloides	Limnebius fretalis	MNCN-AI1307	Spain	Cádiz, Ventorillo de las Canillas, Afl. río Hozgarganta 27.7.1998	1998	I. Ribera	LN995205	HF931180	HF931401	LN995322	LN995374	56	31	23	2.38899	0.0579939	2.12489	0.0761807	1.21199	0.0446
30	Limnebius	Limnebius	nitidus-nitiduloides	Limnebius hispanicus	MNCN-AI1309	Spain	Sevilla, Osuna, Arroyo El Pintado 27.7.1998	1998	I. Ribera	HF947987	HF931181	HF931402	LN995323	LN995375	2	3	3	2.05888	2.02-2.04	1.89576	1.80-2.00	0.710692	0.69-0.73
31	Limnebius	Limnebius	nitidus-nitiduloides	Limnebius levantinus	IBE-RA731	Iran	S-Iran, Prov. Fars. vic. Dash-e / Arzhan, oak nature reserve / 29º34'02"N 51º56'44"E, 2100- / 2300m, 29.iv.2010 leg. A. Skale (35)	2010	A. Skale	LN995206	-	LN995273	LN995298	LN995376	13	10	7	2.00074	0.0492	1.81865	0.063709	0.657749	0.03
32	Limnebius	Limnebius	nitidus-nitiduloides	Limnebius nitiduloides	IBE-AR16	Italy	21.vii.09 (AP) / Quintodecimo / Torr. Str. X / Nove[?]	2009	M. Toledo	LN995207	LN995246	-	LN995324	-	4	9	7	2.45456	0.121	2.21671	2.19-2.26	0.999026	0.0468
33	Limnebius	Limnebius	nitidus-nitiduloides	Limnebius schoenmanni	IBE-RA1000	Greece	28/vi/12 Gr. Peloponnese, Spasti-Elnitsas Bl., 3km E of Kambos	2012	D.T. Bilton	-	-	LN995274	LN995299	LN995377	0	5	5	2.13284	2.13-2.40	?	?	0.586716	0.68-0.73
34	Limnebius	Limnebius	nitidus-nitiduloides	Limnebius simplex	MNCN-AC39	Sicily (Italy)	10 Sicilia, Parco dei Nebrodi/ Stream in trail to Caserma Mafauda/ 1399m 33N 456874 E, 4194317 N/ 13.06.07 PA&FP leg.	2007	P. Abellán & F. Picazo		HF931110	HF931327	LN995325	LN995378	8	4	4	1.95718	1.84-2.08	1.9631	0.0751795	0.679731	0.66-0.70
35	Limnebius	Limnebius	nitidus-nitiduloides	Limnebius spinosus	IBE-AN54	Turkey	27/vi/2014 TR ANT; stream @ Catallar	2014	D.T. Bilton	LN995209	LN995247	LN995275	LN995300	-	17	10	3	1.97638	0.071	1.83075	0.0654024	0.645756	0.60-0.68
36	Limnebius	Limnebius	nitidus-nitiduloides	Limnebius theryi	MNCN-AI950	Tunisia	3 Tunisia 23.10.2001 /Rd. Beja-Teboursouk/Oued 3 km NW Teboursouk/I.Ribera & A.Cieslak leg.	2001	I. Ribera & A. Cieslak	LN995210	HF931248	HF931484	LN995326	LN995379	4	5	4	2.24045	2.22-2.39	1.9202	1.80-1.97	0.839363	0.83-0.85
37	Limnebius	Limnebius	nitidus-nitidus	Limnebius bacchus	IBE-PA274	Morocco	73 MOROCCO 10.4.2007/gorges Rd. Rommani-Ben Slimane/str. in Nerium, afl. Oued Korifla/265m N33º32'59.4" W6º44'54.9"/Aguilera Hernando & Ribera leg. / 10.4.2007	2007	I. Ribera, P. Aguilera & C. Hernando	-	HF931291	HF931526	LN995327	LN995380	4	5	5	1.26463	1.11-1.32	1.2723	1.17-1.30	0.334392	0.31-0.36
38	Limnebius	Limnebius	nitidus-nitidus	Limnebius corfidius	IBE-AN33	Turkey	22 TR Kütahya prov. 29.7.2014; 3.2 Km W Kizilçukur: river source; 39°45'0.2"N 29°19'45.7"E 970m; I.Ribera & A.Cieslak leg.	2014	I. Ribera & A. Cieslak	LN995211	LN995248	-	-	-	10	10	10	1.13533	0.0213	1.19362	0.0781322	0.305812	0.009
39	Limnebius	Limnebius	nitidus-nitidus	Limnebius corybus	MNCN-AI1280	Turkey	TR04 DÜZCE 23.4.2006, Rd. to Kartalkaya from Çaydurt, fast stream in coniferous forest, 1540m N40º39’20” E31º47’8.5”	2006	I. Ribera		HF931178	HF931399	LN995328	-	15	20	20	1.2167	0.053	1.24957	0.058897	0.335517	0.338
40	Limnebius	Limnebius	nitidus-nitidus	Limnebius hieronymi	IBE-AR22	Italy	16 ITA, PN Abruzzo, Pescasseroli / effluent Fiume Sangro, La Camala / N41º49’14” E13º47’35” 1174m / 26.7.2010 I.Ribera & A.Cieslak leg.	2010	I. Ribera & A. Cieslak	LN995212	LN995249	LN995276	LN995301	LN995381	10	25	24	1.27643	0.054	1.27802	0.0454697	0.377655	0.01
41	Limnebius	Limnebius	nitidus-nitidus	Limnebius ibericus	IBE-RA88	Spain	4 ES Ávila Sa. Gredos 25.3.2007 /S Pto. de Mijares, rd. Av901 pk20.5/1418m N40º19’37.4” W4º49’09.2”/small side fall on rock I.Ribera leg./ / 25.3.2007	2007	I. Ribera	-	LN995250	-	-	LN995382	11	6	5	1.21322	1.21-1.30	1.26424	0.0719212	0.428065	0.40-0.45
42	Limnebius	Limnebius	nitidus-nitidus	Limnebius kocheri	IBE-RA91	Morocco	72 MOROCCO 9.4.2007/Zaër Zaïane, Tachenrhout/rv. crsrd. Aguelmoussa-Goaïda/905m N33º7'59.4" W5º58'46.7"/Aguilera Hernando & Ribera leg. / 9.4.2007	2007	I. Ribera, P. Aguilera & C. Hernando	LN995213	HF931323	HF931546	LN995329	LN995383	15	12	12	1.33259	0.0477027	1.44945	0.076862	0.32347	0.0167213
43	Limnebius	Limnebius	nitidus-nitidus	Limnebius minoricensis	IBE-AR23	Menorca (Spain)	6 Menorca, Cami del Alocs / stream crossing road / N40º02'59" E3º59'44" 17m/27.2.2010 IR&AC&BR leg	2010	I. Ribera & A. Cieslak	LN995214	HF931265	HF931501	LN995330	LN995384	44	27	27	1.2443	0.038	1.39844	0.0621793	0.423357	0.025
44	Limnebius	Limnebius	nitidus-nitidus-cplx	Limnebius aguilerai	MNCN-AI910	Morocco	27 MOROCCO 24.4.2000 / Oued Âit-Baha, Tioulit / 29º52'59"N 9º00'65"W / 1150m I.Ribera leg.	2000	I. Ribera	HF947985	HE610230	HF931470	LN995331	LN995385	5	5	5	1.37978	1.30-1.53	1.37491	1.28-1.43	0.524762	0.49-0.54
45	Limnebius	Limnebius	nitidus-nitidus-cplx	Limnebius gerhardti	MNCN-AI891	Spain	ES Madrid Sieteiglesias/Ayo. Quiñón Jábalo, M131 pk15/N40º54'17" W3º34'34" 940m/I.Ribera & A.Cieslak leg 170606/	2006	I. Ribera & A. Cieslak	HF947986	LN995251	LN995277	LN995302	LN995386	0	20	20	1.41944	0.0726	?	?	0.463511	0.0146
46	Limnebius	Limnebius	nitidus-nitidus-cplx	Limnebius hilaris	MNCN-AI919	Spain	Almería, Molinos, Río Aguas 29.7.1998	1998	I. Ribera	HG915297	HE610232	HF931475	LN995332	LN995387	20	24	24	1.35032	0.043	1.33559	0.0588887	0.480202	0.02
47	Limnebius	Limnebius	nitidus-nitidus-cplx	Limnebius irmelae	MNCN-AI949	Tunisia	3 Tunisia 23.10.2001 /Rd. Beja-Teboursouk/Oued 3 km NW Teboursouk/I.Ribera & A.Cieslak leg.	2001	I. Ribera & A. Cieslak		HE610233	HF931483	LN995333	-	3	2	2	1.43376	1.37-1.47	1.41482	1.38-1.45	0.571968	0.57-0.58
48	Limnebius	Limnebius	nitidus-nitidus-cplx	Limnebius maurus	MNCN-AI1317	Mallorca (Spain)	4 MALLORCA 13.10.04/Pollensa: Torrent de Son Marc 66m/N39º52’25.2” E2º59’46.7” /I.Ribera & A.Cieslak leg.	2004	I. Ribera & A. Cieslak	LN995215	LN995252	LN995278	LN995303	LN995388	52	86	84	1.43799	0.066	1.41355	0.0544002	0.494376	0.0186
49	Limnebius	Limnebius	nitidus-nitidus-cplx	Limnebius millani	MNCN-AI920	Spain	Albacete, Paterna del Madera, Arroyo de la Fuenfria, 30.7.1998	1998	I. Ribera		HE610235	HF931476	-	LN995389	2	4	2	1.35846	1.32-1.38	1.38566	1.36-1.41	0.480134	0.47-0.49
50	Limnebius	Limnebius	nitidus-nitidus-cplx	Limnebius monfortei	IBE-AF199	Spain	Granada, Sierra Nevada, Barranco de las Viboras 12.8.2007	2007	A. Castro	-	HE610236	HF931341	-	LN995390	2	3	3	1.43865	1.43-1.44	1.45023	1.41-1.47	0.452491	0.45-0.47
51	Limnebius	Limnebius	nitidus-nitidus-cplx	Limnebius montanus	MNCN-AI936	Spain	13 SPAIN Avila, Venta del Obispo/rd. N502 pk 48, ponds by r. Alberche/1230m N40º22’50.5” W5º01’10”/I.Ribera leg. 15.5.2005	2005	I. Ribera & C. Hernando	-	HE610237	HF931478	LN995334	LN995391	3	5	5	1.35616	1.13-1.44	1.35781	1.33-1.37	0.635913	0.59-0.67
52	Limnebius	Limnebius	nitidus-nitidus-cplx	Limnebius nitidus	MNCN-AI377	Spain	2 ES Barcelona 25.7.2005 IR leg/La Pobla de Lillet. Te. de Solls/Rd. to S. Jaume. de Frontanyà/1055m N 42º12’26.2” E2º00”23.5”	2005	I. Ribera	LN995216	HE610238	HF931415	LN995335	LN995392	14	24	24	1.39865	0.05	1.37769	0.0324816	0.505573	0.0139
53	Limnebius	Limnebius	nitidus-nitidus-cplx	Limnebius ordunyai	MNCN-AI848	Spain	Tarragona, El Toscar, 31T02773/45256, 510m, boulders with mossy runnels [?], pH 8.3, cond 0.47 ppt, 17ºC, 1.6.2006	2006	G.N. Foster	HF947989	LN995253	LN995279	-	-	6	10	8	1.29545	0.0615	1.30102	1.25-1.38	0.446421	0.01
54	Limnebius	Limnebius	nitidus-punctatus	Limnebius ignarus	MNCN-AI993	Spain	Almería, Abrucena, Río Nacimiento 19.5.2006	2006	A. Castro	HF947988	HF931262	HF931498	-	LN995393	4	4	3	1.10522	0.97-1.17	1.10009	1.06-1.16	0.393776	0.38-0.41
55	Limnebius	Limnebius	nitidus-punctatus	Limnebius mucronatus	MNCN-AI704	Corsica (France)	Corte, river Restonica, 2 15.9.1999	1999	I. Ribera & A. Cieslak	LN995217	HF931223	HF931452	LN995336	LN995394	33	40	16	1.18381	0.049	1.29038	0.0613323	0.366494	0.00954
56	Limnebius	Limnebius	nitidus-punctatus	Limnebius pilicauda	IBE-AR60	Morocco	13 MOROCCO Tizi-n-ifar; 4km S, rd. 1901, stream; N32º28’48” W5º47’43.8” 1610m; Ribera & Cieslak leg. 13.7.2011	2011	I. Ribera & A. Cieslak	LN995218	LN995254	LN995280	LN995304	LN995395	29	44	35	1.51299	0.0794	1.26883	0.0731906	0.462177	0.0187
57	Limnebius	Limnebius	nitidus-punctatus	Limnebius zaerensis	MNCN-AC14	Morocco	73 MOROCCO 10.4.2007/gorges Rd. Rommani-Ben Slimane/str. in Nerium, afl. Oued Korifla/265m N33º32'59.4" W6º44'54.9"/Aguilera Hernando & Ribera leg.	2007	I. Ribera, P. Aguilera & C. Hernando	-	EU365868	EU365865+EU365866+EU365867	HE970937	HE970984	0	1	1	1.30565	?	?	?	0.509967	?
58	Limnebius	Limnebius	nitidus-truncatellus	Limnebius mesatlanticus	MNCN-AI913	Morocco	28 MOROCCO 25.4.2000 / Oued Massa, Assif-Oumarhouz / 29º47'53"N 9º05'59"W / 1500m I.Ribera leg.	2000	I. Ribera	-	HF931239	HF931471	LN995337	LN995396	15	19	19	2.03919	0.072	1.90593	0.0892333	0.806713	0.014
59	Limnebius	Limnebius	nitidus-truncatellus	Limnebius truncatellus	MNCN-AI451	Spain	12 SPAIN Avila, Puerto Pico de Gredos/N. side, rd. N502 pk 53, stream on left/1280m N40º20’14” W5º00’48”/I.Ribera leg. 15.5.2005	2005	I. Ribera	LN995219	HF931201	HF931426	LN995338	LN995397	160	126	104	2.37775	0.095	1.97551	0.0715731	0.700814	0.03
60	Limnebius	Limnebius	parvulus-aluta	Limnebius aluta	MNCN-AI953	England (U.K.)	UK Norfolk, The Broads, 7.5.2006 /Catfield Fen, site 4 BBC	2006	I. Ribera	LN995220	HF931249	HF931485	LN995339	LN995398	37	34	34	1.07865	0.0247	1.14785	0.0394832	0.478611	0.0149
61	Limnebius	Limnebius	parvulus-aluta	Limnebius lusitanus	MNCN-AI899	Spain	1 ES Avila, Sa. Gredos 270506/rd. AV931 ca. 1km N Plataforma/springs & head rv. Tormes/1700m N40º16’53” W5º13’45”	2006	I. Ribera & A. Cieslak	HG915296	HF931238	HF931468	LN995340	LN995399	4	6	5	1.10965	1.04-1.37	1.16587	1.03-1.25	0.358068	0.34-0.39
62	Limnebius	Limnebius	parvulus-parvulus	Limnebius crinifer	IBE-AR55	Sweden	3 Sweden, Öland, Möckelmossen, ponds in limestone, 56º31'49"N 16º31'36.30"E 23m 22.5.2011 I.Ribera leg.	2011	I. Ribera	LN995221	LN995255	LN995281	LN995305	LN995400	51	48	31	1.93388	0.0882	1.70179	0.0755877	0.702222	0.024
63	Limnebius	Limnebius	parvulus-parvulus	Limnebius doderoi	MNCN-AI1174	Corsica (France)	11, Cap Corse: Bertolacce, 21.9.1999	1999	I. Ribera & A. Cieslak	LN995222	HF931170	HF931389	LN995341	LN995401	28	12	10	2.04663	0.132	1.65424	0.0801701	0.594199	0.0475
64	Limnebius	Limnebius	parvulus-parvulus	Limnebius furcatus	MNCN-AI987	Spain	3 ES Navarra 21.7.04/Pitillas: pond in crossroad/42°25’29“N 1°38‘35“ W/360m I.Ribera & A.Cieslak leg	2004	I. Ribera & A. Cieslak	LN995223	LN995256	LN995282	-	-	73	44	27	1.96157	0.099	1.63428	0.0800045	0.570426	0.0435
65	Limnebius	Limnebius	parvulus-parvulus	Limnebius papposus	IBE-RA84	Montenegro	25/vi/2009 Crna Gora Niksic / Susika Reka & flooded margins on / Niksisko Polje beside E762 3km N / of Niksic. D.T. Bilton	2009	D.T. Bilton	LN995224	LN995257	LN995283	LN995306	LN995402	97	96	51	2.07044	0.0926	1.81697	0.113692	0.669922	0.0543
66	Limnebius	Limnebius	parvulus-parvulus	Limnebius parvulus	MNCN-AI706	Poland	4 POL. Zachodniopomorsky/20.8.04 Dygowo: pond in field/N54º08’10” E15º42’28”/24m I.Ribera & A.Cieslak leg	2004	I. Ribera & A. Cieslak	LN995225	HF931224	HF931453	LN995342	LN995403	47	42	21	1.92669	0.097	1.69542	0.0763756	0.617608	0.031
67	Limnebius	Limnebius	parvulus-parvulus	Limnebius reuvenortali	IBE-AN45	Turkey	9 TR Izmir prov. 23.7.2014; 1 Km E Yukaribey: fountain; 39°15'11.4"N 27°4'43.7"E 470m; I.Ribera & A.Cieslak leg.	2014	I. Ribera & A. Cieslak	LN995226	LN995258	LN995284	LN995307	LN995404	3	3	3	2.01568	2.00-2.06	1.70018	1.57-1.75	0.506458	0.49-0.54
68	Limnebius	Limnebius	parvulus-parvulus	Limnebius rubropiceus	IBE-AN32	Turkey	22 TR Kütahya prov. 29.7.2014; 3.2 Km W Kizilçukur: river source; 39°45'0.2"N 29°19'45.7"E 970m;	2014	I. Ribera & A. Cieslak	LN995227	LN995259	LN995285	LN995308	LN995405	7	13	9	1.92613	0.073	1.73708	0.060734	0.649651	0.02
69	Limnebius	Limnebius	parvulus-parvulus	Limnebius stagnalis	MNCN-AI824	Turkey	TR14 KARABÜK 28.4.2006, Rd. E80,E cross to Gerede, stream in Cayorenguney, 1231m N40º48’23” E32º16’00.5”	2006	I. Ribera	LN995228	HF931230	HF931459	LN995343	LN995406	74	78	46	1.86839	0.09	1.62957	0.0719019	0.554613	0.032
70	Limnebius	Limnebius	piceus	Limnebius arenicolus	MNCN-AI466	California (U.S.)	14 US California Trinity co. / junc. Rd. 36 & 14, Forest Glen / Rattlesnake Creek / 22.6.2000 I.Ribera & A.Cieslak	2000	I. Ribera & A. Cieslak	LN995229	HF931204	HF931429	LN995344	LN995407	16	14	14	1.25814	0.0462	1.30193	0.0379013	0.467312	0.015
71	Limnebius	Limnebius	piceus	Limnebius piceus	IBE-RA1120	California (U.S.)	CA: Monterrey Co., 35.9518ºN 121.8017ºW, Nacimiento - Ferguson Rd., xi.2.2007, M.S. Caterino & A.S. Short leg.	2007	M.S. Caterino & A.E.Z. Short	LN995230	-	-	LN995345	LN995408	2	3	3	1.11993	1.12-1.29	1.21705	1.12-1.28	0.518629	0.44-0.46
72	Limnebius	Limnebius	piceus	Limnebius sinuatus	IBE-AR9	Arizona (U.S.)	AZ: Yavapai Co., Gloody Basin, 22 VI 2007 3610', Agua Fri River / WDS-A-1745	2007	W.D. Shepard	LN995231	-	-	LN995346	LN995409	2	1	1	1.21837	?	1.28506	1.19-1.38	0.363544	?
