# Supplementary material for: The macroevolution of size and complexity in insect male genitalia
Source: PeerJ. 2016 Apr 14;4:e1882. doi: 10.7717/peerj.1882 (PMC4841225; doi:10.7717/peerj.1882)
Supplement: Table S2 — Reconstructed values of the measured variables in all branches of the phylogeny (see Fig. S2 for the location of the branch numbers). The raw values of the initial and final nodes of each branch are given, together with the amount of phenotypic change, the absolute phenotypic change, and the change measured in darwins (×106). In pink, composite branch after deleting terminals with missing males. In yellow, reconstructed values. [file peerj-04-1882-s002.xlsx]

## Sheet: Hoja1
Rudoy & Ribera, The macroevolution of size and complexity in insect male genitalia
Table S2
Reconstructed values of the measured variables in all branches of the phylogeny (see Figure S2 for the location of the branch numbers). The raw values of the initial and final nodes of each branch are given, together with the amount of phenotypic change, the absolute phenotypic change, and the change measured in darwins (x10^6).
In pink, composite branch after deleting terminals with missing males. In yellow, reconstructed values.
					branch measures
					initial	final	initial	final	initial	final	initial	final	initial	final	phenotypic change					absolute change					darwins
branch No	compound branch	terminal	subgenus	branch length	per	per	fd	fd	lf	lf	lm	lm	lg	lg	per	fd	lf	lm	lg	Aper	Afd	Alf	Alm	Alg	Dper	Dfd	Dlf	Dlm	Dlg
1		sahlbergi	Laeliaena	34.75	3.657	3	1.2475	1.28	1.2504	1.247	1.2699	1.42	0.4194	0.39	-0.657	0.0325	-0.0034	0.1501	-0.0294	0.657	0.0325	0.0034	0.1501	0.0294	0.00569873	0.000740102	7.83549e-05	0.00321493	0.00209146
2			stem Limnebius	5.27	3.657	3.74	1.2475	1.243	1.2504	1.2513	1.2699	1.2491	0.4194	0.4223	0.083	-0.0045	0.0009	-0.0208	0.0029	0.083	0.0045	0.0009	0.0208	0.0029	0.00425853	0.000685718	0.00013653	0.00313375	0.00130756
3			stem Bilimneus	10.9	3.74	2.689	1.243	1.1898	1.2513	1.1013	1.2491	0.9935	0.4223	0.3636	-1.051	-0.0532	-0.15	-0.2556	-0.0587	1.051	0.0532	0.15	0.2556	0.0587	0.0302675	0.00401308	0.0117148	0.0210041	0.0137304
4			stem s.str.	10	3.74	4.893	1.243	1.2825	1.2513	1.3915	1.2491	1.4379	0.4223	0.4842	1.153	0.0395	0.1402	0.1888	0.0619	1.153	0.0395	0.1402	0.1888	0.0619	0.026872	0.00312835	0.0106199	0.014076	0.0136782
5			Bilimneus	1.966	2.689	2.585	1.1898	1.1844	1.1013	1.0964	0.9935	0.9676	0.3636	0.3621	-0.104	-0.0054	-0.0049	-0.0259	-0.0015	0.104	0.0054	0.0049	0.0259	0.0015	0.020063	0.00231379	0.00226817	0.0134361	0.00210272
6			Bilimneus	4.2929	2.689	2.498	1.1898	1.1804	1.1013	1.0478	0.9935	0.9448	0.3636	0.343	-0.191	-0.0094	-0.0535	-0.0487	-0.0206	0.191	0.0094	0.0535	0.0487	0.0206	0.017163	0.00184767	0.0116002	0.0117079	0.0135861
8			Bilimneus	1.966	2.585	2.527	1.1844	1.1817	1.0964	1.0933	0.9676	0.9468	0.3621	0.3546	-0.058	-0.0027	-0.0031	-0.0208	-0.0075	0.058	0.0027	0.0031	0.0208	0.0075	0.0115426	0.00116085	0.0014402	0.0110534	0.010646
10	7+10	pollex	Bilimneus	16.5976	2.585	2.26	1.1844	1.16	1.0964	1.0997	0.9676	0.93	0.3621	0.44	-0.325	-0.0244	0.0033	-0.0376	0.0779	0.325	0.0244	0.0033	0.0376	0.0779	0.00809519	0.00125418	0.00018107	0.00238795	0.0117399
11		India	Bilimneus	14.689	2.527	2.2	1.1817	1.17	1.0933	1.0923	0.9468	0.83	0.3546	0.31	-0.327	-0.0117	-0.001	-0.1168	-0.0446	0.327	0.0117	0.001	0.1168	0.0446	0.00943396	0.0006774	6.2297e-05	0.00896332	0.00915094
12			Bilimneus	3.622	2.527	2.477	1.1817	1.1792	1.0933	1.0839	0.9468	0.9367	0.3546	0.3441	-0.05	-0.0025	-0.0094	-0.0101	-0.0105	0.05	0.0025	0.0094	0.0101	0.0105	0.00551758	0.000584715	0.00238404	0.00296102	0.00829875
13		feuerborni	Bilimneus	11.046	2.477	2.48	1.1792	1.17	1.0839	1.0842	0.9367	0.83	0.3441	0.25	0.003	-0.0092	0.0003	-0.1067	-0.0941	0.003	0.0092	0.0003	0.1067	0.0941	0.000109579	0.00070908	2.50534e-05	0.0109485	0.0289219
15	14+15	atomus	Bilimneus	11.047	2.477	2.34	1.1792	1.18	1.0839	1.06	0.9367	0.99	0.3441	0.41	-0.137	0.0008	-0.0239	0.0533	0.0659	0.137	0.0008	0.0239	0.0533	0.0659	0.00515047	6.13919e-05	0.00201835	0.00500968	0.0158618
17			Bilimneus	5.878	2.498	2.339	1.1804	1.1752	1.0478	1.0351	0.9448	0.9036	0.343	0.3592	-0.159	-0.0052	-0.0127	-0.0412	0.0162	0.159	0.0052	0.0127	0.0412	0.0162	0.0111887	0.000751109	0.00207463	0.00758531	0.00785112
18			Bilimneus	2.39	2.498	2.426	1.1804	1.1769	1.0478	1.0194	0.9448	0.9328	0.343	0.3214	-0.072	-0.0035	-0.0284	-0.012	-0.0216	0.072	0.0035	0.0284	0.012	0.0216	0.0122371	0.00124247	0.0114973	0.00534831	0.0272151
19		endroedyi	Bilimneus	8.392	2.339	2.18	1.1752	1.17	1.0351	1.08	0.9036	0.86	0.3592	0.36	-0.159	-0.0052	0.0449	-0.0436	0.0008	0.159	0.0052	0.0449	0.0436	0.0008	0.00838878	0.000528431	0.00505994	0.00589304	0.000265097
20			Bilimneus	1.799	2.339	2.32	1.1752	1.1744	1.0351	1.0221	0.9036	0.9015	0.3592	0.3643	-0.019	-0.0008	-0.013	-0.0021	0.0051	0.019	0.0008	0.013	0.0021	0.0051	0.0045338	0.000378525	0.00702541	0.00129335	0.00783678
21		evanescens	Bilimneus	6.594	2.32	2.25	1.1744	1.17	1.0221	1.01	0.9015	0.88	0.3643	0.32	-0.07	-0.0044	-0.0121	-0.0215	-0.0443	0.07	0.0044	0.0121	0.0215	0.0443	0.00464619	0.000569249	0.00180604	0.00366062	0.0196628
22			Bilimneus	2.505	2.32	2.322	1.1744	1.1752	1.0221	1.0073	0.9015	0.9044	0.3643	0.3889	0.002	0.0008	-0.0148	0.0029	0.0246	0.002	0.0008	0.0148	0.0029	0.0246	0.000343991	0.000271843	0.00582269	0.00128211	0.0260856
23		extraneus	Bilimneus	4.089	2.322	2.35	1.1752	1.17	1.0073	0.95	0.9044	0.84	0.3889	0.37	0.028	-0.0052	-0.0573	-0.0644	-0.0189	0.028	0.0052	0.0573	0.0644	0.0189	0.00293139	0.00108452	0.014323	0.0180655	0.0121837
24			Bilimneus	2.364	2.322	2.307	1.1752	1.17	1.0073	1.028	0.9044	0.9438	0.3889	0.4219	-0.015	-0.0052	0.0207	0.0394	0.033	0.015	0.0052	0.0207	0.0394	0.033	0.0027415	0.00187589	0.00860477	0.0180383	0.0344527
25		perparvulus	Bilimneus	1.725	2.307	2.25	1.1787	1.18	1.028	1	0.9438	0.91	0.4219	0.44	-0.057	0.0013	-0.028	-0.0338	0.0181	0.057	0.0013	0.028	0.0338	0.0181	0.0145031	0.000639016	0.0160088	0.0211418	0.0243515
26		oblongus	Bilimneus	1.725	2.307	2.34	1.1787	1.18	1.028	1.08	0.9438	1.01	0.4219	0.43	0.033	0.0013	0.052	0.0662	0.0081	0.033	0.0013	0.052	0.0662	0.0081	0.00823359	0.000639016	0.0286063	0.0392993	0.0110243
27			Bilimneus	3.107	2.426	2.434	1.1769	1.1767	1.0194	0.9911	0.9328	0.9126	0.3214	0.3106	0.008	-0.0002	-0.0283	-0.0202	-0.0108	0.008	0.0002	0.0283	0.0202	0.0108	0.0010596	5.46998e-05	0.00906149	0.00704639	0.0110011
28			Bilimneus	1.533	2.426	2.367	1.1769	1.1533	1.0194	1.019	0.9328	0.9406	0.3214	0.3126	-0.059	-0.0236	-0.0004	0.0078	-0.0088	0.059	0.0236	0.0004	0.0078	0.0088	0.0160603	0.0132136	0.000256011	0.00543193	0.0181096
29		myrmidon	Bilimneus	8.773	2.434	2.52	1.1767	1.16	0.9911	0.97	0.9126	0.89	0.3106	0.23	0.086	-0.0167	-0.0211	-0.0226	-0.0806	0.086	0.0167	0.0211	0.0226	0.0806	0.00395793	0.00162931	0.00245291	0.00285834	0.0342445
30			Bilimneus	2.357	2.434	2.419	1.1767	1.1806	0.9911	0.9771	0.9126	0.9057	0.3106	0.3221	-0.015	0.0039	-0.014	-0.0069	0.0115	0.015	0.0039	0.014	0.0069	0.0115	0.00262273	0.00140385	0.00603582	0.00322	0.0154248
31		wewalkai	Bilimneus	6.416	2.419	2.28	1.1806	1.18	0.9771	0.91	0.9057	0.83	0.3221	0.36	-0.139	-0.0006	-0.0671	-0.0757	0.0379	0.139	0.0006	0.0671	0.0757	0.0379	0.00922363	7.92309e-05	0.0110886	0.0136039	0.0173382
32			Bilimneus	4.49	2.419	2.464	1.1806	1.1879	0.9771	0.9919	0.9057	0.9363	0.3221	0.321	0.045	0.0073	0.0148	0.0306	-0.0011	0.045	0.0073	0.0148	0.0306	0.0011	0.00410508	0.00137289	0.00334817	0.0074004	0.0007619
33		pararabicus	Bilimneus	1.927	2.464	2.22	1.1879	1.18	0.9919	1	0.9363	0.82	0.321	0.26	-0.244	-0.0079	0.0081	-0.1163	-0.061	0.244	0.0079	0.0081	0.1163	0.061	0.0541146	0.00346269	0.00422054	0.068828	0.109372
34		dioscoridus	Bilimneus	1.927	2.464	2.73	1.1879	1.2	0.9919	0.9925	0.9363	1.07	0.321	0.38	0.266	0.0121	0.0006	0.1337	0.059	0.266	0.0121	0.0006	0.1337	0.059	0.0531996	0.00525922	0.000313813	0.0692672	0.087561
37	35+37	Bhutan	Bilimneus	10.347	2.367	2.2	1.1738	1.17	1.019	1.06	0.9406	1.04	0.3126	0.37	-0.167	-0.0038	0.041	0.0994	0.0574	0.167	0.0038	0.041	0.0994	0.0574	0.00707123	0.000313386	0.00381242	0.0097089	0.0162925
41	36+40+41	nakanei	Bilimneus	10.346	2.367	2.36	1.1738	1.17	1.019	0.98	0.9406	0.86	0.3126	0.23	-0.007	-0.0038	-0.039	-0.0806	-0.0826	0.007	0.0038	0.039	0.0806	0.0826	0.000286266	0.000313416	0.00377194	0.00865896	0.0296583
43			Limnebius s.str.	3.87	4.893	4.848	1.2825	1.2851	1.3915	1.4249	1.4378	1.5097	0.4842	0.5012	-0.045	0.0026	0.0334	0.0719	0.017	0.045	0.0026	0.0334	0.0719	0.017	0.00238743	0.000523317	0.00612903	0.012609	0.00891658
44			Limnebius s.str.	1.296	4.893	4.992	1.2825	1.2861	1.3915	1.3908	1.4378	1.4292	0.4842	0.4845	0.099	0.0036	-0.0007	-0.0086	0.0003	0.099	0.0036	0.0007	0.0086	0.0003	0.015456	0.00216287	0.000388257	0.00462911	0.000477922
45			Limnebius s.str.	6.108	4.848	3.965	1.2861	1.2527	1.4249	1.2784	1.5097	1.2803	0.5012	0.4561	-0.883	-0.0334	-0.1465	-0.2294	-0.0451	0.883	0.0334	0.1465	0.2294	0.0451	0.0329175	0.00430798	0.0177623	0.0269837	0.0154376
46			Limnebius s.str.	3.293	4.848	5.296	1.2861	1.3076	1.4249	1.5418	1.5097	1.7096	0.5012	0.545	0.448	0.0215	0.1169	0.1999	0.0438	0.448	0.0215	0.1169	0.1999	0.0438	0.0268404	0.00503462	0.0239444	0.0377615	0.025442
47		aluta	Limnebius s.str.	9.486	3.965	3.3	1.2527	1.22	1.2784	1.15	1.2803	1.08	0.4561	0.48	-0.665	-0.0327	-0.1284	-0.2003	0.0239	0.665	0.0327	0.1284	0.2003	0.0239	0.0193531	0.00278836	0.0111583	0.0179352	0.00538415
48		lusitanus	Limnebius s.str.	9.486	3.965	3.21	1.2527	1.23	1.2784	1.17	1.2803	1.11	0.4561	0.36	-0.755	-0.0227	-0.1084	-0.1703	-0.0961	0.755	0.0227	0.1084	0.1703	0.0961	0.0222681	0.00192779	0.00934066	0.0150468	0.0249429
49			Limnebius s.str.	5.593	5.293	5.436	1.3076	1.3201	1.5418	1.665	1.7096	1.8709	0.545	0.6142	0.143	0.0125	0.1232	0.1613	0.0692	0.143	0.0125	0.1232	0.1613	0.0692	0.00476637	0.00170107	0.0137448	0.0161202	0.0213722
50			Limnebius s.str.	3.751	5.2963	5.73	1.3076	1.324	1.5418	1.594	1.7096	1.8351	0.545	0.5505	0.4337	0.0164	0.0522	0.1255	0.0055	0.4337	0.0164	0.0522	0.1255	0.0055	0.020983	0.00332286	0.00887657	0.0188855	0.00267693
51		parvulus	Limnebius s.str.	6.707	5.436	4.65	1.3201	1.3	1.665	1.7	1.8709	1.93	0.6142	0.62	-0.786	-0.0201	0.035	0.0591	0.0058	0.786	0.0201	0.035	0.0591	0.0058	0.0232856	0.00228764	0.0031017	0.00463701	0.00140135
52			Limnebius s.str.	3.523	5.436	5.927	1.3201	1.309	1.665	1.7279	1.8709	1.9448	0.6142	0.656	0.491	-0.0111	0.0629	0.0739	0.0418	0.491	0.0111	0.0629	0.0739	0.0418	0.0245458	0.00239682	0.0105256	0.0109962	0.0186887
53		rubropiceus	Limnebius s.str.	3.185	5.927	5.75	1.309	1.34	1.7279	1.74	1.9448	1.93	0.656	0.65	-0.177	0.031	0.0121	-0.0148	-0.006	0.177	0.031	0.0121	0.0148	0.006	0.0095191	0.00734886	0.00219099	0.00239847	0.00288491
54			Limnebius s.str.	1.048	5.927	6.127	1.309	1.344	1.7279	1.7432	1.9448	1.9715	0.656	0.6696	0.2	0.035	0.0153	0.0267	0.0136	0.2	0.035	0.0153	0.0267	0.0136	0.031667	0.0251782	0.00841193	0.013011	0.0195799
55		crinifer	Limnebius s.str.	2.137	6.127	5.61	1.344	1.32	1.7432	1.7	1.9715	1.93	0.6696	0.7	-0.517	-0.024	-0.0432	-0.0415	0.0304	0.517	0.024	0.0432	0.0415	0.0304	0.0412515	0.00843168	0.0117427	0.00995539	0.0207767
56		papposus	Limnebius s.str.	2.137	6.127	7.1	1.344	1.38	1.7432	1.82	1.9715	2.07	0.6696	0.67	0.973	0.036	0.0768	0.0985	0.0004	0.973	0.036	0.0768	0.0985	0.0004	0.0689703	0.0123693	0.020175	0.0228142	0.000279454
57			Limnebius s.str.	7.757	5.73	6.786	1.324	1.3627	1.594	1.6373	1.8351	1.9959	0.5505	0.5785	1.056	0.0387	0.0433	0.1608	0.028	1.056	0.0387	0.0433	0.1608	0.028	0.0218056	0.00371414	0.0034552	0.0108284	0.00639572
58			Limnebius s.str.	7.91	5.73	5.592	1.324	1.32	1.594	1.6624	1.8351	1.9403	0.5505	0.5311	-0.138	-0.004	0.0684	0.1052	-0.0194	0.138	0.004	0.0684	0.1052	0.0194	0.00308199	0.000382518	0.00531173	0.00704723	0.0045356
59		doderoi	Limnebius s.str.	0.793	6.786	6.99	1.3627	1.37	1.6373	1.65	1.9959	2.05	0.5785	0.59	0.204	0.0073	0.0127	0.0541	0.0115	0.204	0.0073	0.0127	0.0541	0.0115	0.0373504	0.00673734	0.00974369	0.033726	0.0248222
60		furcatus	Limnebius s.str.	0.793	6.786	6.7	1.3627	1.36	1.6373	1.63	1.9959	1.96	0.5785	0.57	-0.086	-0.0027	-0.0073	-0.0359	-0.0085	0.086	0.0027	0.0073	0.0359	0.0085	0.0160834	0.00250104	0.00563497	0.0228885	0.0186661
61		stagnalis	Limnebius s.str.	0.639	5.592	5.44	1.32	1.33	1.6624	1.63	1.9403	1.87	0.5311	0.55	-0.152	0.01	-0.0324	-0.0703	0.0189	0.152	0.01	0.0324	0.0703	0.0189	0.0431267	0.011811	0.0308018	0.057753	0.0547229
62		reuvenortali	Limnebius s.str.	0.639	5.592	5.73	1.32	1.31	1.6624	1.7	1.9403	2.02	0.5311	0.51	0.138	-0.01	0.0376	0.0797	-0.0211	0.138	0.01	0.0376	0.0797	0.0211	0.0381511	0.0119008	0.0350014	0.0629967	0.0634423
63			Limnebius s.str.	2.822	4.992	4.736	1.2851	1.2771	1.3908	1.3375	1.4292	1.3473	0.4845	0.4581	-0.256	-0.008	-0.0533	-0.0819	-0.0264	0.256	0.008	0.0533	0.0819	0.0264	0.0186548	0.00221285	0.0138472	0.0209115	0.0198547
64			Limnebius s.str.	4.528	4.992	5.97	1.2851	1.3118	1.3908	1.5057	1.4292	1.5793	0.4845	0.534	0.978	0.0267	0.1149	0.1501	0.0495	0.978	0.0267	0.1149	0.1501	0.0495	0.039512	0.00454145	0.0175307	0.0220554	0.0214837
65			Limnebius s.str.	12.893	4.736	2.865	1.2771	1.2153	1.3375	1.273	1.3473	1.2069	0.4581	0.415	-1.871	-0.0618	-0.0645	-0.1404	-0.0431	1.871	0.0618	0.0645	0.1404	0.0431	0.0389843	0.00384712	0.00383354	0.00853545	0.00766377
66			Limnebius s.str.	4.883	4.736	5.084	1.2771	1.2889	1.3375	1.2736	1.3473	1.2526	0.4581	0.4531	0.348	0.0118	-0.0639	-0.0947	-0.005	0.348	0.0118	0.0639	0.0947	0.005	0.0145209	0.00188353	0.0100255	0.0149255	0.00224752
67		piceus	Limnebius s.str.	2.454	2.865	2.55	1.2153	1.22	1.273	1.22	1.2069	1.12	0.4531	0.52	-0.315	0.0047	-0.053	-0.0869	0.0669	0.315	0.0047	0.053	0.0869	0.0669	0.0474633	0.0015729	0.017329	0.0304509	0.056119
68			Limnebius s.str.	0.898	2.865	2.621	1.2153	1.2104	1.273	1.2831	1.2069	1.2222	0.4531	0.4357	-0.244	-0.0049	0.0101	0.0153	-0.0174	0.244	0.0049	0.0101	0.0153	0.0174	0.099123	0.00449897	0.00880034	0.0140283	0.0436068
69		sinuatus	Limnebius s.str.	1.557	2.621	2.77	1.2104	1.19	1.2831	1.29	1.2222	1.22	0.4357	0.36	0.149	-0.0204	0.0069	-0.0022	-0.0757	0.149	0.0204	0.0069	0.0022	0.0757	0.0355115	0.0109169	0.00344457	0.00115713	0.122575
70		arenicolus	Limnebius s.str.	1.557	2.621	2.82	1.2104	1.22	1.2831	1.3	1.2222	1.26	0.4357	0.47	0.199	0.0096	0.0169	0.0378	0.0343	0.199	0.0096	0.0169	0.0378	0.0343	0.0470013	0.00507384	0.00840414	0.0195628	0.0486697
71			Limnebius s.str.	1.524	5.084	5.337	1.2889	1.2972	1.2735	1.292	1.2526	1.2656	0.415	0.4136	0.253	0.0083	0.0185	0.013	-0.0014	0.253	0.0083	0.0185	0.013	0.0014	0.031867	0.00421191	0.00946351	0.00677489	0.00221732
72	72+75	cordobanus	Limnebius s.str.	10.458	5.084	3.85	1.2889	1.25	1.2735	1.01	1.2526	0.92	0.415	0.33	-1.234	-0.0389	-0.2635	-0.3326	-0.085	1.234	0.0389	0.2635	0.3326	0.085	0.0265849	0.00293035	0.0221666	0.0295088	0.0219149
73		fallaciosus	Limnebius s.str.	8.94	5.337	7.25	1.2972	1.33	1.292	1.4	1.2656	1.31	0.4136	0.42	1.913	0.0328	0.108	0.0444	0.0064	1.913	0.0328	0.108	0.0444	0.0064	0.034266	0.00279316	0.00897996	0.00385691	0.0017176
74		gracilipes	Limnebius s.str.	8.94	5.337	5.13	1.2972	1.32	1.292	1.2813	1.2656	1.32	0.4136	0.4	-0.207	0.0228	-0.0107	0.0544	-0.0136	0.207	0.0228	0.0107	0.0544	0.0136	0.00442484	0.00194895	0.000930226	0.00470754	0.00373991
77			Limnebius s.str.	7.273	5.97	8.06	1.318	1.377	1.5057	1.8676	1.5793	2.0522	0.534	0.7317	2.09	0.059	0.3619	0.4729	0.1977	2.09	0.059	0.3619	0.4729	0.1977	0.0412714	0.00602114	0.0296159	0.0360141	0.0433074
78			Limnebius s.str.	0.913	5.97	6.113	1.318	1.3155	1.5057	1.5168	1.5793	1.5945	0.534	0.5372	0.143	-0.0025	0.0111	0.0152	0.0032	0.143	0.0025	0.0111	0.0152	0.0032	0.0259263	0.00207953	0.00804485	0.0104912	0.00654395
79			Limnebius s.str.	3.176	8.06	8.544	1.377	1.3741	1.8676	1.9328	2.0522	2.1443	0.7317	0.8408	0.484	-0.0029	0.0652	0.0921	0.1091	0.484	0.0029	0.0652	0.0921	0.1091	0.0183614	0.000663806	0.0108046	0.0138227	0.0437605
80			Limnebius s.str.	0.814	8.06	8.155	1.377	1.384	1.8676	1.8932	2.0522	2.0807	0.7317	0.7331	0.095	0.007	0.0256	0.0285	0.0014	0.095	0.007	0.0256	0.0285	0.0014	0.0143952	0.00622928	0.0167252	0.0169435	0.00234831
81		hispanicus	Limnebius s.str.	3.192	8.544	8.63	1.3741	1.37	1.9328	1.9	2.1443	2.06	0.8408	0.71	0.086	-0.0041	-0.0328	-0.0843	-0.1308	0.086	0.0041	0.0328	0.0843	0.1308	0.0031376	0.000936163	0.00536211	0.0125649	0.0529727
82			Limnebius s.str.	1.418	8.544	8.718	1.3741	1.3731	1.9328	1.9709	2.1443	2.2153	0.8408	0.9468	0.174	-0.001	0.0381	0.071	0.106	0.174	0.001	0.0381	0.071	0.106	0.0142176	0.000513409	0.0137663	0.0229723	0.0837335
83		theryi	Limnebius s.str.	1.773	8.718	10.07	1.3731	1.37	1.9709	1.92	2.2153	2.24	0.9468	0.84	1.352	-0.0031	-0.0509	0.0247	-0.1068	1.352	0.0031	0.0509	0.0247	0.1068	0.0813146	0.0012748	0.0147575	0.00625382	0.0675048
84			Limnebius s.str.	1.169	8.718	8	1.3731	1.3746	1.9709	2.0369	2.2153	2.2622	0.9468	1.1073	-0.718	0.0015	0.066	0.0469	0.1605	0.718	0.0015	0.066	0.0469	0.1605	0.0735229	0.00093398	0.0281769	0.0179213	0.133954
85		fretalis	Limnebius s.str.	0.577	8	8.12	1.3745	1.38	2.0369	2.12	2.2622	2.39	1.1073	1.21	0.12	0.0055	0.0831	0.1278	0.1027	0.12	0.0055	0.0831	0.1278	0.1027	0.0258035	0.00692109	0.0693016	0.0952436	0.153719
86		alibeii	Limnebius s.str.	0.577	8	7.5	1.3745	1.37	2.0369	1.99	2.2622	2.16	1.1073	1.09	-0.5	-0.0045	-0.0469	-0.1022	-0.0173	0.5	0.0045	0.0469	0.1022	0.0173	0.111852	0.00568334	0.0403716	0.0801206	0.027291
87			Limnebius s.str.	3.398	8.155	8.438	1.384	1.3885	1.8932	1.8298	2.0807	2.0078	0.7331	0.6726	0.283	0.0045	-0.0634	-0.0729	-0.0605	0.283	0.0045	0.0634	0.0729	0.0605	0.0100395	0.000955318	0.0100241	0.0104958	0.0253477
88			Limnebius s.str.	1.072	8.155	8.167	1.384	1.3886	1.8932	1.9436	2.0807	2.1395	0.7331	0.7464	0.012	0.0046	0.0504	0.0588	0.0133	0.012	0.0046	0.0504	0.0588	0.0133	0.00137165	0.00309532	0.0245088	0.0259961	0.016772
89		spinosus	Limnebius s.str.	2.156	8.438	7.77	1.3885	1.39	1.8298	1.83	2.0078	1.98	0.6726	0.65	-0.668	0.0015	0.0002	-0.0278	-0.0226	0.668	0.0015	0.0002	0.0278	0.0226	0.0382538	0.000500797	5.06937e-05	0.00646695	0.0158527
90		levantinus	Limnebius s.str.	2.156	8.438	9.31	1.3885	1.42	1.8298	1.8	2.0078	2	0.6726	0.66	0.872	0.0315	-0.0298	-0.0078	-0.0126	0.872	0.0315	0.0298	0.0078	0.0126	0.045614	0.0104048	0.00761596	0.00180539	0.00877132
91			Limnebius s.str.	1.447	8.167	8.208	1.3886	1.3917	1.9436	2.0139	2.1395	2.1699	0.7464	0.7902	0.041	0.0031	0.0703	0.0304	0.0438	0.041	0.0031	0.0703	0.0304	0.0438	0.00346071	0.0015411	0.0245551	0.00975047	0.0394087
92			Limnebius s.str.	2.261	8.167	8.143	1.3886	1.3961	1.9436	1.9312	2.1395	2.1978	0.7464	0.6894	-0.024	0.0075	-0.0124	0.0583	-0.057	0.024	0.0075	0.0124	0.0583	0.057	0.00130163	0.00238239	0.00283076	0.0118906	0.0351349
93		simplex	Limnebius s.str.	3.036	8.208	8.13	1.3917	1.39	2.0139	1.96	2.1699	1.96	0.7902	0.68	-0.078	-0.0017	-0.0539	-0.2099	-0.1102	0.078	0.0017	0.0539	0.2099	0.1102	0.00314505	0.000402594	0.00893566	0.0335101	0.0494708
94		nitiduloides	Limnebius s.str.	3.036	8.208	8.39	1.3917	1.4	2.0139	2.22	2.1699	2.45	0.7902	1	0.182	0.0083	0.2061	0.2801	0.2098	0.182	0.0083	0.2061	0.2801	0.2098	0.00722373	0.00195857	0.0320929	0.0399891	0.077559
95		crassipes	Limnebius s.str.	2.222	8.143	8.38	1.3961	1.41	1.9312	1.92	2.1978	2.33	0.6894	0.73	0.237	0.0139	-0.0112	0.1322	0.0406	0.237	0.0139	0.0112	0.1322	0.0406	0.0129115	0.00445863	0.00261764	0.0262878	0.0257529
96		schoenmanni	Limnebius s.str.	2.222	8.143	7.88	1.3961	1.39	1.9312	1.9326	2.1978	2.13	0.6894	0.59	-0.263	-0.0061	0.0014	-0.0678	-0.0994	0.263	0.0061	0.0014	0.0678	0.0994	0.0147753	0.0019707	0.000326136	0.0141021	0.0700716
97			Limnebius s.str.	7.814	6.113	6.425	1.3155	1.3254	1.5168	1.2914	1.5945	1.325	0.5372	0.4414	0.312	0.0099	-0.2254	-0.2695	-0.0958	0.312	0.0099	0.2254	0.2695	0.0958	0.00637049	0.000959493	0.0205882	0.0236944	0.0251368
98			Limnebius s.str.	1.139	6.113	5.997	1.3155	1.3109	1.5168	1.5222	1.5945	1.5999	0.5372	0.5349	-0.116	-0.0046	0.0054	0.0054	-0.0023	0.116	0.0046	0.0054	0.0054	0.0023	0.0168203	0.00307541	0.00312011	0.00296832	0.00376703
99		mucronatus	Limnebius s.str.	4.914	6.425	6.05	1.3254	1.3	1.2914	1.29	1.325	1.18	0.4414	0.37	-0.375	-0.0254	-0.0014	-0.145	-0.0714	0.375	0.0254	0.0014	0.145	0.0714	0.0122382	0.00393774	0.000220733	0.0235853	0.0359073
100			Limnebius s.str.	2.89	6.425	6.775	1.3254	1.3445	1.2914	1.2142	1.325	1.314	0.4414	0.4502	0.35	0.0191	-0.0772	-0.011	0.0088	0.35	0.0191	0.0772	0.011	0.0088	0.0183539	0.00495083	0.0213292	0.00288462	0.0068306
101		pilicauda	Limnebius s.str.	2.024	6.775	7.78	1.3445	1.36	1.2142	1.27	1.314	1.51	0.4502	0.46	1.005	0.0155	0.0558	0.196	0.0098	1.005	0.0155	0.0558	0.196	0.0098	0.0683384	0.00566329	0.0221993	0.0686926	0.0106396
102			Limnebius s.str.	0.389	6.775	6.684	1.3445	1.345	1.2142	1.1917	1.314	1.2874	0.4502	0.4505	-0.091	0.0005	-0.0225	-0.0266	0.0003	0.091	0.0005	0.0225	0.0266	0.0003	0.0347629	0.000955826	0.0480837	0.0525739	0.00171246
103		zaerensis	Limnebius s.str.	1.634	6.684	7.2	1.345	1.35	1.1917	1.207	1.2874	1.31	0.4505	0.51	0.516	0.005	0.0153	0.0226	0.0595	0.516	0.005	0.0153	0.0226	0.0595	0.0455107	0.00227086	0.00780727	0.0106502	0.0759196
104		ignarus	Limnebius s.str.	1.634	6.684	5.64	1.345	1.34	1.1917	1.1	1.2874	1.11	0.4505	0.39	-1.044	-0.005	-0.0917	-0.1774	-0.0605	1.044	0.005	0.0917	0.1774	0.0605	0.103937	0.00227931	0.0490029	0.0907372	0.0882566
105			Limnebius s.str.	7.317	5.997	8.212	1.3109	1.3786	1.5222	1.8624	1.5999	2.0857	0.5349	0.7145	2.215	0.0677	0.3402	0.4858	0.1796	2.215	0.0677	0.3402	0.4858	0.1796	0.0429598	0.00688186	0.0275672	0.0362394	0.0395658
106			Limnebius s.str.	4.574	5.997	4.158	1.3109	1.2508	1.5222	1.3323	1.5999	1.3156	0.5349	0.4111	-1.839	-0.0601	-0.1899	-0.2843	-0.1238	1.839	0.0601	0.1899	0.2843	0.1238	0.0800667	0.0102603	0.029132	0.042774	0.0575521
107		truncatellus	Limnebius s.str.	4.272	8.212	9.42	1.3786	1.4	1.8624	1.98	2.0857	2.38	0.7145	0.7	1.208	0.0214	0.1176	0.2943	-0.0145	1.208	0.0214	0.1176	0.2943	0.0145	0.0321251	0.00360575	0.0143331	0.0308979	0.00479931
108		mesatlanticus	Limnebius s.str.	4.272	8.212	8.12	1.3786	1.39	1.8624	1.91	2.0857	2.04	0.7145	0.81	-0.092	0.0114	0.0476	-0.0457	0.0955	0.092	0.0114	0.0476	0.0457	0.0955	0.00263725	0.00192773	0.0059076	0.00518603	0.0293659
109			Limnebius s.str.	1.383	4.158	3.784	1.2508	1.2347	1.3323	1.2885	1.3156	1.2605	0.4111	0.3815	-0.374	-0.0161	-0.0438	-0.0551	-0.0296	0.374	0.0161	0.0438	0.0551	0.0296	0.0681508	0.00936755	0.0241707	0.0309359	0.0540316
110			Limnebius s.str.	0.905	4.158	4.055	1.2508	1.2492	1.3323	1.332	1.3156	1.3025	0.4111	0.4094	-0.103	-0.0016	-0.0003	-0.0131	-0.0017	0.103	0.0016	0.0003	0.0131	0.0017	0.0277166	0.00141436	0.00024884	0.0110578	0.00457881
111		murentius	Limnebius s.str.	5.633	3.784	2.38	1.2347	1.19	1.332	1.15	1.2605	1.09	0.3815	0.32	-1.404	-0.0447	-0.182	-0.1705	-0.0615	1.404	0.0447	0.182	0.1705	0.0615	0.0823151	0.0065462	0.026082	0.0257999	0.0312071
112			Limnebius s.str.	0.419	3.784	3.815	1.2347	1.2348	1.332	1.2876	1.2605	1.261	0.3815	0.3791	0.031	0.0001	-0.0444	0.0005	-0.0024	0.031	0.0001	0.0444	0.0005	0.0024	0.0194726	0.000193289	0.0809106	0.000946514	0.0150616
113		hieronymi	Limnebius s.str.	5.213	3.815	2.67	1.2348	1.18	1.2876	1.28	1.261	1.28	0.3791	0.38	-1.145	-0.0548	-0.0076	0.019	0.0009	1.145	0.0548	0.0076	0.019	0.0009	0.0684562	0.00870796	0.00113561	0.00286879	0.000454869
114			Limnebius s.str.	1.58	3.815	4	1.2348	1.2415	1.2876	1.245	1.261	1.22	0.3791	0.3537	0.185	0.0067	-0.0426	-0.041	-0.0254	0.185	0.0067	0.0426	0.041	0.0254	0.0299707	0.00342488	0.021294	0.0209204	0.043893
115		corfidius	Limnebius s.str.	3.633	4	4.24	1.2415	1.25	1.245	1.19	1.22	1.14	0.3537	0.31	0.24	0.0085	-0.055	-0.08	-0.0437	0.24	0.0085	0.055	0.08	0.0437	0.0160388	0.00187812	0.0124366	0.0186685	0.0362997
116		corybus	Limnebius s.str.	3.633	4	4.3	1.2415	1.25	1.245	1.25	1.22	1.22	0.3537	0.34	0.3	0.0085	0.005	0	-0.0137	0.3	0.0085	0.005	0	0.0137	0.0199066	0.00187812	0.00110323	0	0.0108735
117		minoricensis	Limnebius s.str.	6.11	4.055	2.62	1.2492	1.19	1.332	1.4	1.3025	1.24	0.4094	0.42	-1.435	-0.0592	0.068	-0.0625	0.0106	1.435	0.0592	0.068	0.0625	0.0106	0.0714855	0.007946	0.00814904	0.00804814	0.00418364
118			Limnebius s.str.	0.479	4.055	4.175	1.2492	1.2559	1.332	1.3273	1.3025	1.3006	0.4094	0.4081	0.12	0.0067	-0.0047	-0.0019	-0.0013	0.12	0.0067	0.0047	0.0019	0.0013	0.0608845	0.0111672	0.00737947	0.0030476	0.00663973
119		bacchus	Limnebius s.str.	5.633	4.175	4.55	1.2559	1.28	1.3273	1.27	1.3006	1.26	0.4081	0.33	0.375	0.0241	-0.0573	-0.0406	-0.0781	0.375	0.0241	0.0573	0.0406	0.0781	0.0152695	0.00337434	0.00783417	0.00563003	0.0377099
120			Limnebius s.str.	0.526	4.175	4.204	1.2559	1.2578	1.3273	1.3309	1.3006	1.3124	0.4081	0.4166	0.029	0.0019	0.0036	0.0118	0.0085	0.029	0.0019	0.0036	0.0118	0.0085	0.0131599	0.00287398	0.00514943	0.0171708	0.0391907
121		kocheri	Limnebius s.str.	5.107	4.204	3.55	1.2578	1.24	1.3309	1.35	1.3124	1.33	0.4166	0.32	-0.654	-0.0178	0.0191	0.0176	-0.0966	0.654	0.0178	0.0191	0.0176	0.0966	0.0331092	0.00279083	0.00279013	0.00260846	0.0516557
122			Limnebius s.str.	0.721	4.204	4.344	1.2578	1.2632	1.3309	1.3293	1.3124	1.3084	0.4166	0.4391	0.14	0.0054	-0.0016	-0.004	0.0225	0.14	0.0054	0.0016	0.004	0.0225	0.0454357	0.00594178	0.0016684	0.00423371	0.0729551
123		ibericus	Limnebius s.str.	4.386	4.344	4.4	1.2632	1.26	1.3293	1.26	1.3084	1.21	0.4391	0.43	0.056	-0.0032	-0.0693	-0.0984	-0.0091	0.056	0.0032	0.0693	0.0984	0.0091	0.00292042	0.000578309	0.0122072	0.017826	0.00477473
124			Limnebius s.str.	3.115	4.344	4.807	1.2632	1.2872	1.3293	1.3764	1.3084	1.3848	0.4391	0.524	0.463	0.024	0.0471	0.0764	0.0849	0.463	0.024	0.0471	0.0764	0.0849	0.0325129	0.0060421	0.0111778	0.0182185	0.0567462
125			Limnebius s.str.	0.513	4.807	5.094	1.2872	1.2859	1.3764	1.3731	1.3848	1.3825	0.524	0.5509	0.287	-0.0013	-0.0033	-0.0023	0.0269	0.287	0.0013	0.0033	0.0023	0.0269	0.113041	0.0019697	0.00467922	0.00324029	0.097586
126			Limnebius s.str.	0.366	4.807	4.747	1.2872	1.2944	1.3764	1.3806	1.3848	1.3937	0.524	0.5149	-0.06	0.0072	0.0042	0.0089	-0.0091	0.06	0.0072	0.0042	0.0089	0.0091	0.0343179	0.0152403	0.00832457	0.0175037	0.0478661
127		montanus	Limnebius s.str.	0.758	5.094	5.26	1.2944	1.3	1.3731	1.36	1.3825	1.36	0.5509	0.64	0.166	0.0056	-0.0131	-0.0225	0.0891	0.166	0.0056	0.0131	0.0225	0.0891	0.0423056	0.00569525	0.0126468	0.0216474	0.197777
128		nitidus	Limnebius s.str.	0.758	5.094	5.06	1.2944	1.3	1.3731	1.38	1.3825	1.4	0.5509	0.51	-0.034	0.0056	0.0069	0.0175	-0.0409	0.034	0.0056	0.0069	0.0175	0.0409	0.00883495	0.00569525	0.00661285	0.0165947	0.101771
129		irmelae	Limnebius s.str.	0.906	4.747	4.41	1.2859	1.27	1.3806	1.41	1.3937	1.43	0.5149	0.57	-0.337	-0.0159	0.0294	0.0363	0.0551	0.337	0.0159	0.0294	0.0363	0.0551	0.0812783	0.0137328	0.0232577	0.0283801	0.112212
130			Limnebius s.str.	0.33	4.747	4.79	1.2859	1.2898	1.3806	1.3814	1.3937	1.39	0.5149	0.4974	0.043	0.0039	0.0008	-0.0037	-0.0175	0.043	0.0039	0.0008	0.0037	0.0175	0.027326	0.00917668	0.00175543	0.00805556	0.104782
131			Limnebius s.str.	0.198	4.79	4.736	1.2898	1.2863	1.3814	1.3722	1.39	1.3888	0.4974	0.4836	-0.054	-0.0035	-0.0092	-0.0012	-0.0138	0.054	0.0035	0.0092	0.0012	0.0138	0.0572602	0.0137237	0.0337484	0.00436203	0.142103
132			Limnebius s.str.	0.099	4.79	4.823	1.2898	1.2923	1.3814	1.3847	1.39	1.3897	0.4974	0.476	0.033	0.0025	0.0033	-0.0003	-0.0214	0.033	0.0025	0.0033	0.0003	0.0214	0.0693508	0.0195597	0.0241013	0.00218031	0.444209
133		maurus	Limnebius s.str.	0.378	4.736	4.3	1.2863	1.28	1.3722	1.41	1.3888	1.44	0.476	0.49	-0.436	-0.0063	0.0378	0.0512	0.014	0.436	0.0063	0.0378	0.0512	0.014	0.255497	0.0129889	0.07189	0.0957753	0.0766866
134			Limnebius s.str.	0.104	4.736	4.794	1.2863	1.2857	1.3722	1.3607	1.3888	1.3795	0.476	0.4682	0.058	-0.0006	-0.0115	-0.0093	-0.0078	0.058	0.0006	0.0115	0.0093	0.0078	0.117041	0.00448618	0.0809233	0.0646053	0.158868
135		gerhardti	Limnebius s.str.	0.275	4.794	5.1	1.2857	1.295	1.3607	1.38	1.3795	1.42	0.4682	0.46	0.306	0.0043	0.0193	0.0405	-0.0082	0.306	0.0043	0.0193	0.0405	0.0082	0.225001	0.0121415	0.0512154	0.105221	0.0642511
136		ordunyai	Limnebius s.str.	0.275	4.794	4.69	1.2857	1.28	1.3607	1.3	1.3795	1.3	0.4682	0.45	-0.104	-0.0057	-0.0607	-0.0795	-0.0182	0.104	0.0057	0.0607	0.0795	0.0182	0.0797547	0.0161572	0.165945	0.215843	0.144174
137		monfortei	Limnebius s.str.	0.476	4.823	4.89	1.2923	1.3	1.3847	1.45	1.3897	1.44	0.4836	0.45	0.067	0.0077	0.0653	0.0503	-0.0336	0.067	0.0077	0.0653	0.0503	0.0336	0.0289835	0.0124804	0.0968068	0.0746958	0.151283
138			Limnebius s.str.	0.126	4.823	4.857	1.2923	1.294	1.3847	1.3739	1.3897	1.3767	0.4836	0.4879	0.034	0.0017	-0.0108	-0.013	0.0043	0.034	0.0017	0.0108	0.013	0.0043	0.0557526	0.0104335	0.0621436	0.0745918	0.0702567
139		hilaris	Limnebius s.str.	0.35	4.857	4.64	1.294	1.28	1.3739	1.33	1.3767	1.35	0.4879	0.48	-0.217	-0.014	-0.0439	-0.0267	-0.0079	0.217	0.014	0.0439	0.0267	0.0079	0.13059	0.0310803	0.0927842	0.0559564	0.046641
140			Limnebius s.str.	0.09	4.857	4.913	1.294	1.298	1.3739	1.3781	1.3767	1.374	0.4879	0.4922	0.056	0.004	0.0042	-0.0027	0.0043	0.056	0.004	0.0042	0.0027	0.0043	0.127375	0.0342936	0.0339148	0.0218126	0.0974963
141		millani	Limnebius s.str.	0.26	4.913	5.45	1.298	1.31	1.3781	1.39	1.374	1.36	0.4922	0.48	0.537	0.012	0.0119	-0.014	-0.0122	0.537	0.012	0.0119	0.014	0.0122	0.398965	0.0353943	0.0330693	0.0393904	0.0965347
142		aguilerai	Limnebius s.str.	0.26	4.913	4.6	1.298	1.3	1.3781	1.37	1.374	1.38	0.4922	0.52	-0.313	0.002	-0.0081	0.006	0.0278	0.313	0.002	0.0081	0.006	0.0278	0.253186	0.00592172	0.0226731	0.0167589	0.211322
